# Supplementary material for: A hemin/rGO/MWCNT nanocomposite-based dual signal electrochemical aptasensor for sensitive detection of NSE
Source: Royal Society of Chemistry journal article supplement (doi:10.1039/d4ay01238k), 2024-01-01
Supplement: d4ay01238k1.pdf [file d4ay01238k1.pdf]

# Supplementary Information

## **Hemin/rGO/MWCNT nanocomposites-based dual signal electrochemical aptasensor for sensitive detection of NSE**

Huyue Wei<sup>1,2</sup>, Mingzhu Yang<sup>1,2</sup>, Chengshuai Huang<sup>1,2</sup>, Xiaojie Yue<sup>3</sup>, Jiabin Cai<sup>3</sup>,  
Xinyi Wang<sup>2</sup>, Kai Fan<sup>4</sup>, Linxi Dong<sup>1,2</sup>, Gaofeng Wang<sup>1,2</sup>, Dujuan Li<sup>1,2\*</sup>

<sup>1</sup> Ministry of Education Engineering Research Center of Smart Microsensors and  
Microsystems, Hangzhou Dianzi University, Hangzhou, 310018, China

<sup>2</sup> School of Electronics and Information, Hangzhou Dianzi University, Hangzhou,  
310018, China

<sup>3</sup> The Children's Hospital of Zhejiang University School of Medicine, Hangzhou,  
310052, China

<sup>4</sup> School of Automation, Hangzhou Dianzi University, Hangzhou, 310018, China

\* Correspondence: [dujuanli@hdu.edu.cn](mailto:dujuanli@hdu.edu.cn)

## 1. SEM raw image

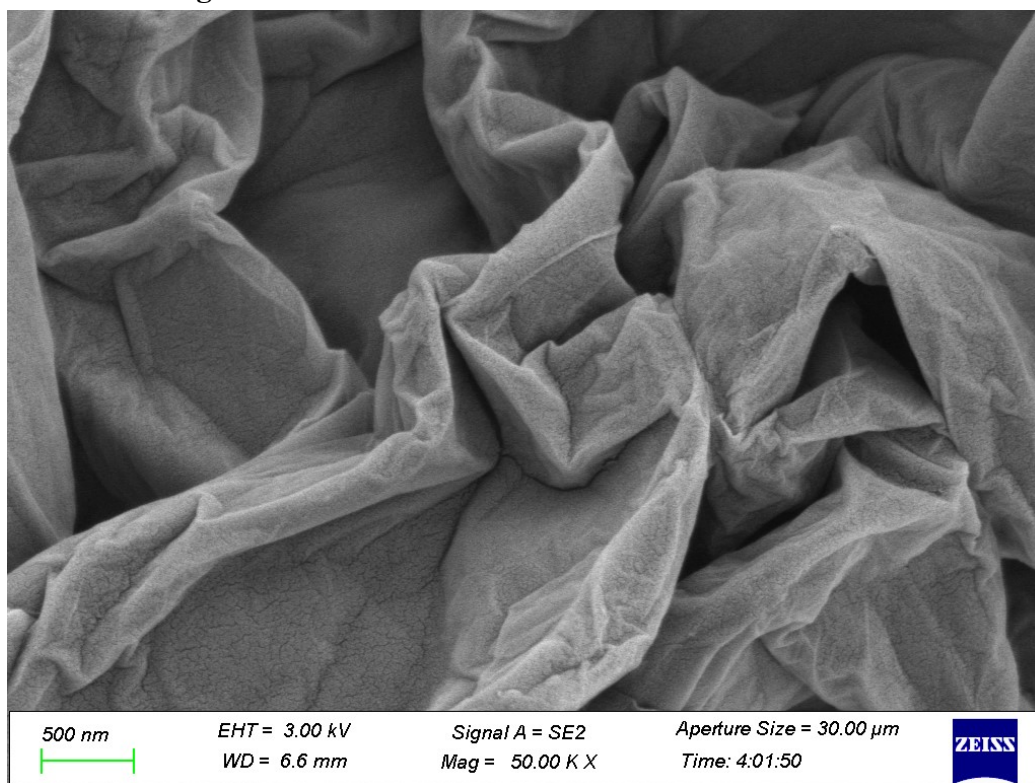

**Fig. S1.** The original uncropped SEM image of the GO (Fig. 2A).

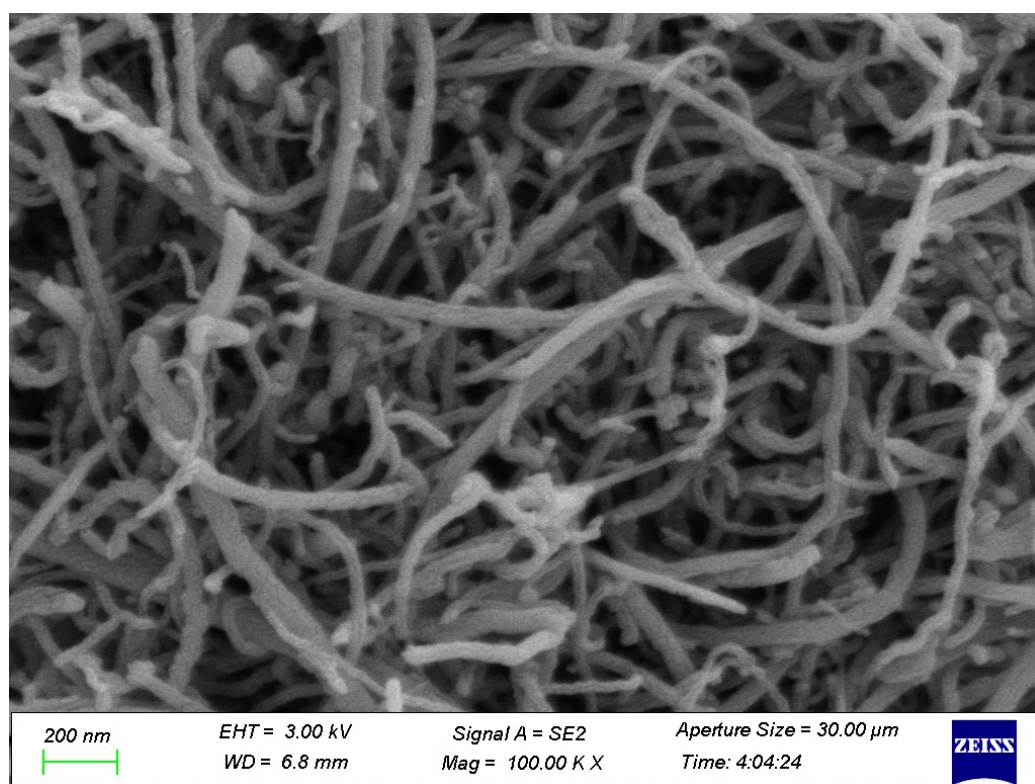

**Fig. S2.** The original uncropped SEM image of the MWCNT (Fig. 2B).

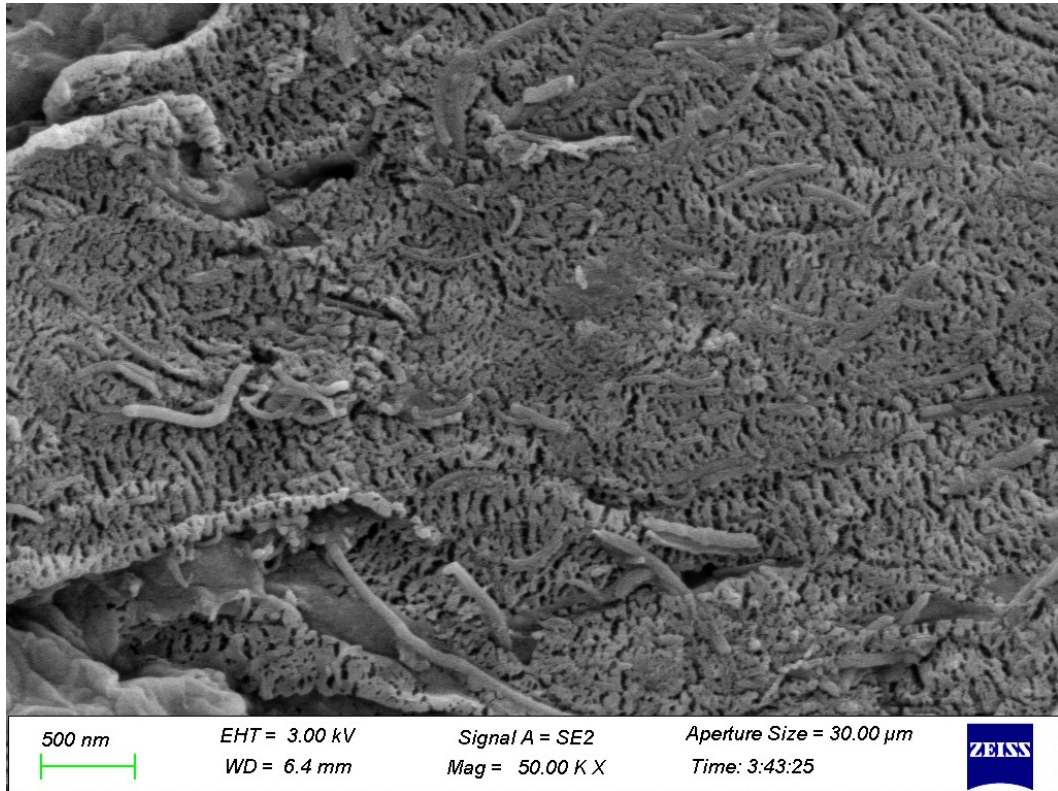

Fig. S3. The original uncropped SEM image of the H-rGO-MWCNT (Fig. 2C).

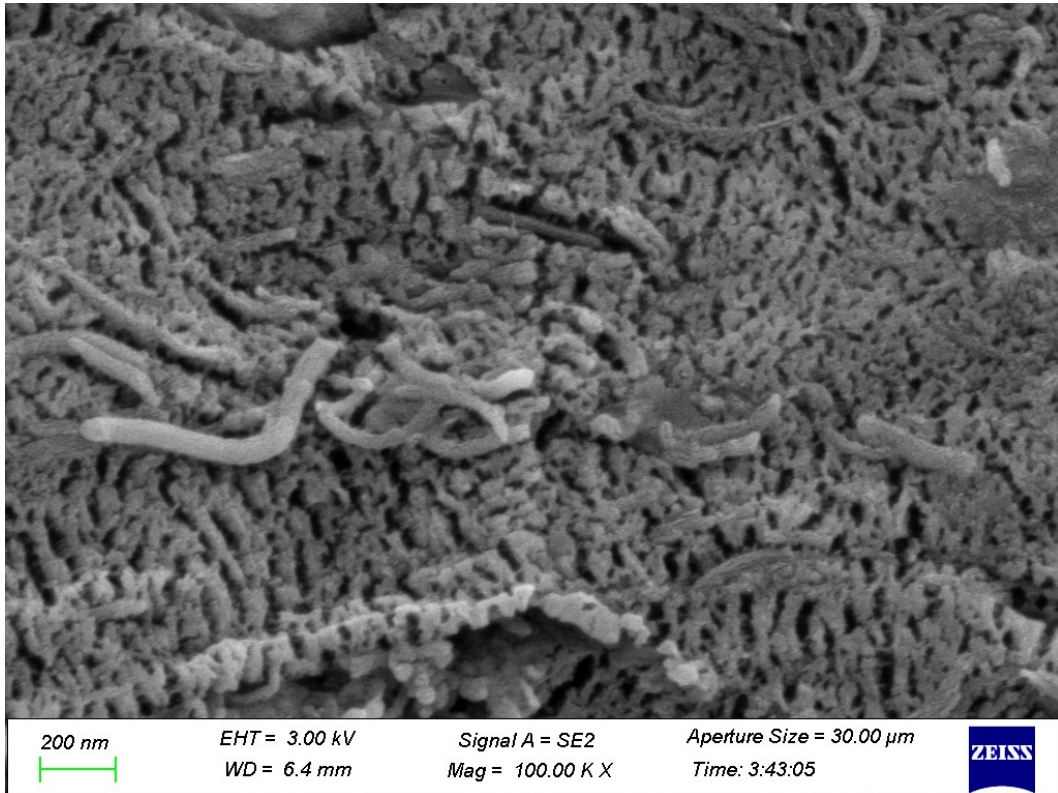

Fig. S4. The original uncropped SEM image of the Partial enlargement of H-rGO-MWCNT (Fig. 2D).

## 2. The catalytic mechanism of Hemin on H<sub>2</sub>O<sub>2</sub> and the enzyme activity validation experiments with H-rGO-MWCNT.

During the electrochemical sensing process, the electrochemical interface provided an electron to reduce Fe (III) to Fe (II), which was later re-oxidized to Fe (III) during the catalytic process. This reversible conversion between Fe(II) and Fe (III) facilitated the catalytic reaction of H<sub>2</sub>O<sub>2</sub>. The inferred catalytic mechanism of Hemin on H<sub>2</sub>O<sub>2</sub> could be elucidated as follows:

Firstly, H<sub>2</sub>O<sub>2</sub> was chemically adsorbed to Fe (II), the center of hemin. The activated H<sub>2</sub>O<sub>2</sub> then dissociated an H atom to form the Fe (II)-OOH and the H atom bound to the N atom of hemin. Subsequently, the peroxide bond in Fe (II)-OOH broke, generating Fe (III)-O and -OH. And the -OH reacted with the H atom to form H<sub>2</sub>O. Finally, H<sub>2</sub>O desorbed, completing the catalytic reduction of H<sub>2</sub>O<sub>2</sub>.

Fig. S5 depicted the absorbance of H-rGO-MWCNT under different catalytic systems at 650 nm. In the presence of TMB but without H<sub>2</sub>O<sub>2</sub>, H-rGO-MWCNT showed no significant absorbance peak (curve c), indicating that the oxidase-like capacity of H-rGO-MWCNT was negligible. In contrast, in the presence of H<sub>2</sub>O<sub>2</sub>, H-rGO-MWCNT generated a blue oxidized TMB solution (TMB<sub>ox</sub>) and exhibited a distinct characteristic peak at 650 nm (curve d), demonstrating its excellent peroxidase-like capacity.

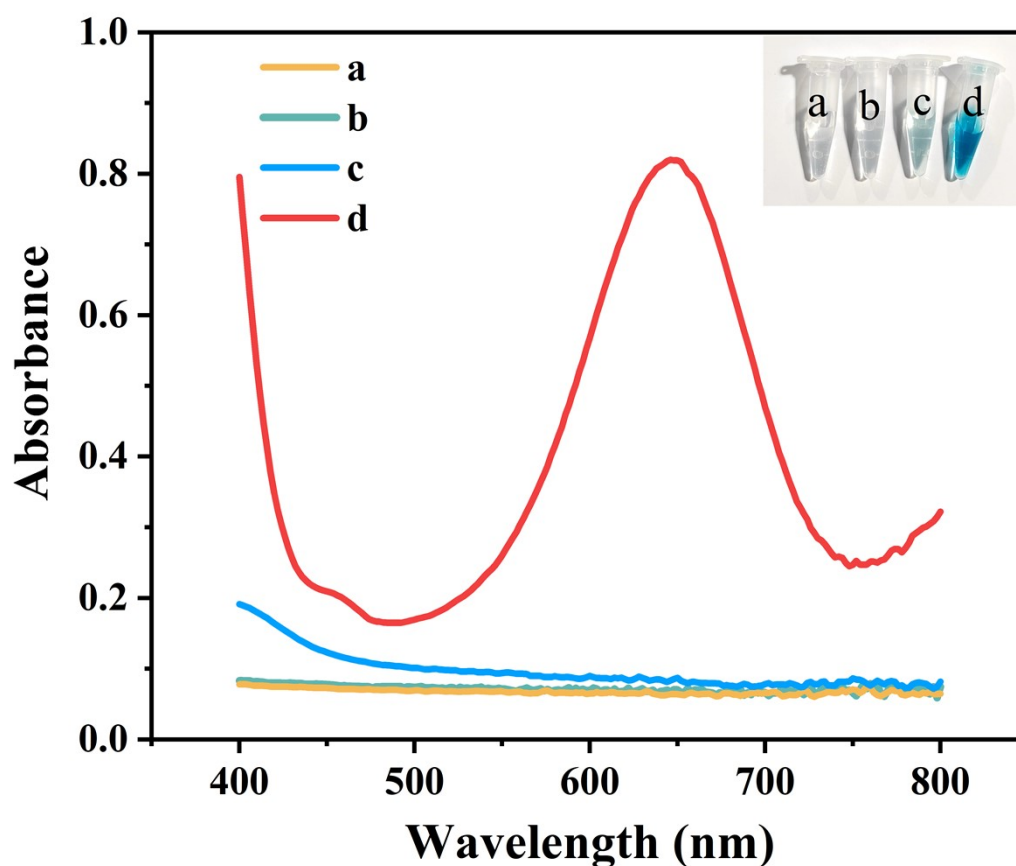

Fig. S5. The absorbance at 650 nm of H-rGO-MWCNT in different catalytic systems: TMB (a), TMB+H<sub>2</sub>O<sub>2</sub> (b), TMB+H-rGO-MWCNT (c), TMB+H<sub>2</sub>O<sub>2</sub>+H-rGO-MWCNT (d).

**Table S1.** Results of detecting NSE in human serum samples.

| Standard concentration<br>in the sample (ng/mL) | Method            | Found (ng/mL) | Relative error (%) |
|-------------------------------------------------|-------------------|---------------|--------------------|
| 1.2                                             | DPV               | 1.417         | 18.05              |
| 1.2                                             | chronoamperometry | 1.39          | 15.83              |
